# Supplementary material for: A high density nanopore 3-triangulene kagome lattice
Source: Royal Society of Chemistry journal article supplement (doi:10.1039/d4nr00910j), 2024-01-01
Supplement: d4nr00910j1.pdf [file d4nr00910j1.pdf]

## Supporting material for: High density nanopore 3-trianguleene kagome lattice

Pedro Elias Priori Spalenza,<sup>a</sup> Fábio Arthur Leão de Souza,<sup>b</sup> Rodrigo G. Amorim,<sup>c</sup> Ralph H. Scheicher<sup>d</sup> and Wanderlã Luis Scopel<sup>a</sup>

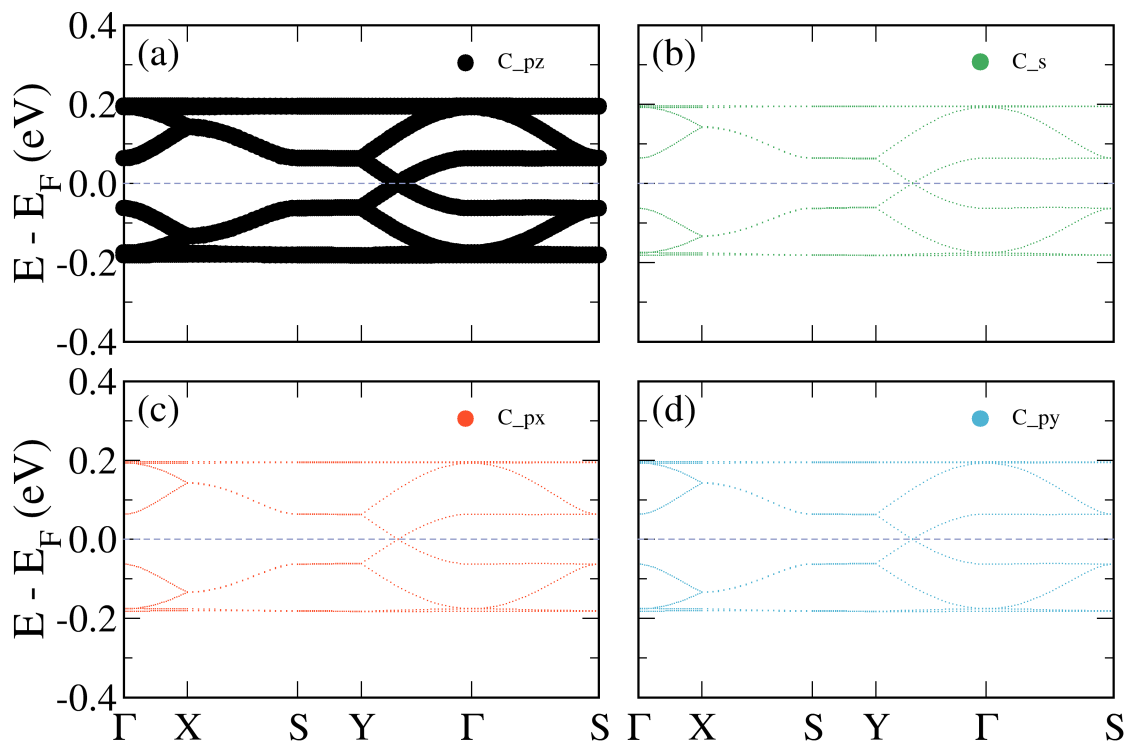

Fig. S1 Projected band structure for carbon orbitals of 3-trianguleene kagome pristine, (a) C- $p_z$ , (b) C- $s$ , (c) C- $p_x$  and (d) C- $p_y$ .

<sup>a</sup> Departamento de Física, Universidade Federal do Espírito Santo - UFES, Vitória/ES, Brazil. E-mail: pedro.spalenza@edu.ufes.br

<sup>b</sup> Instituto Federal de Educação, Ciência e Tecnologia do Espírito Santo - IFES, Ibatiba/ES, Brazil. E-mail: fabio.souza@ifes.edu.br

<sup>c</sup> Departamento de Física, ICEx, Universidade Federal Fluminense - UFF, Volta Redonda/RJ, Brazil. E-mail: rgamorim@id.uff.br

<sup>d</sup> Division of Materials Theory, Department of Physics and Astronomy, Uppsala University, Box 516, SE-751 20 Uppsala, Sweden E-mail: ralph.scheicher@physics.uu.se

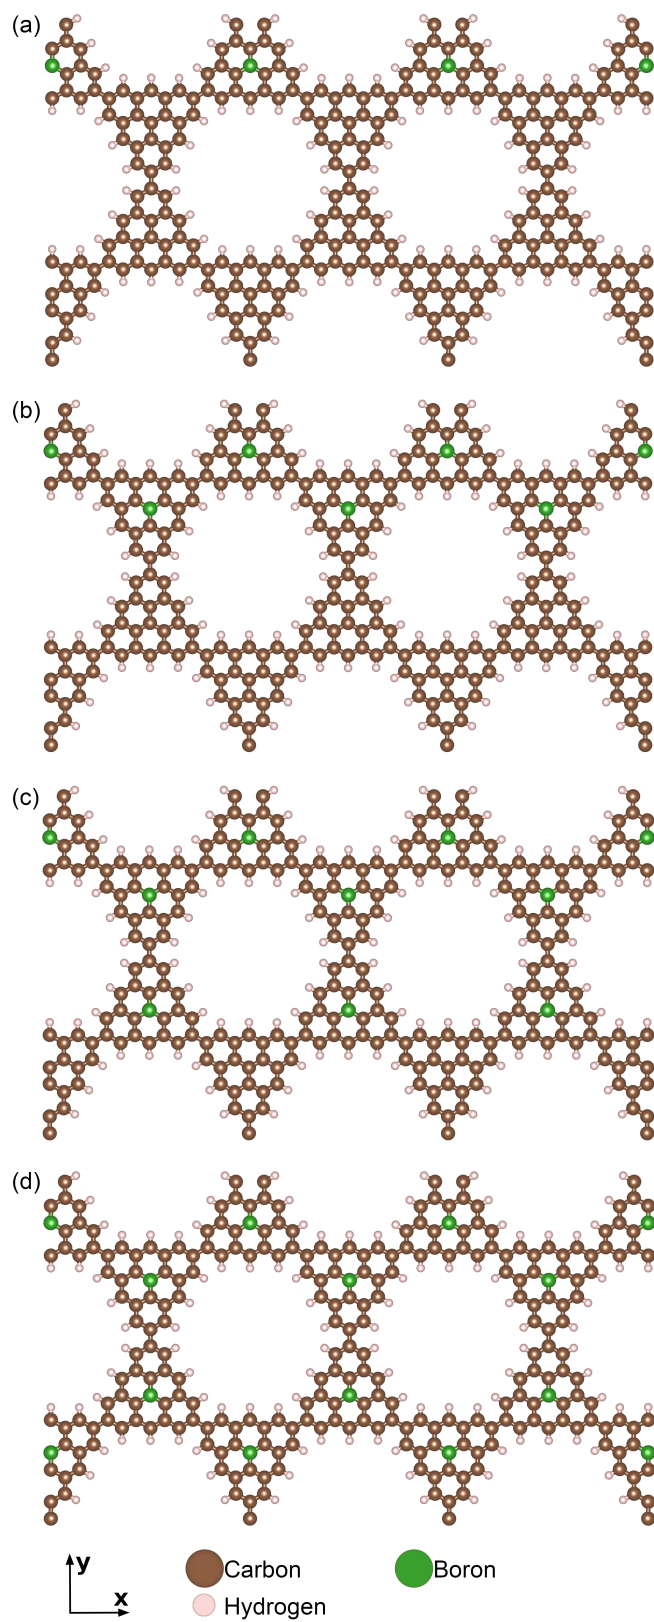

**Fig. S2** Optimized geometry of the scattering region of the transport device of B-doped 3-triangularene kagome: (a) 1B-doped, (b) 2B-doped, (c) 3B-doped and (d) 4B-doped .

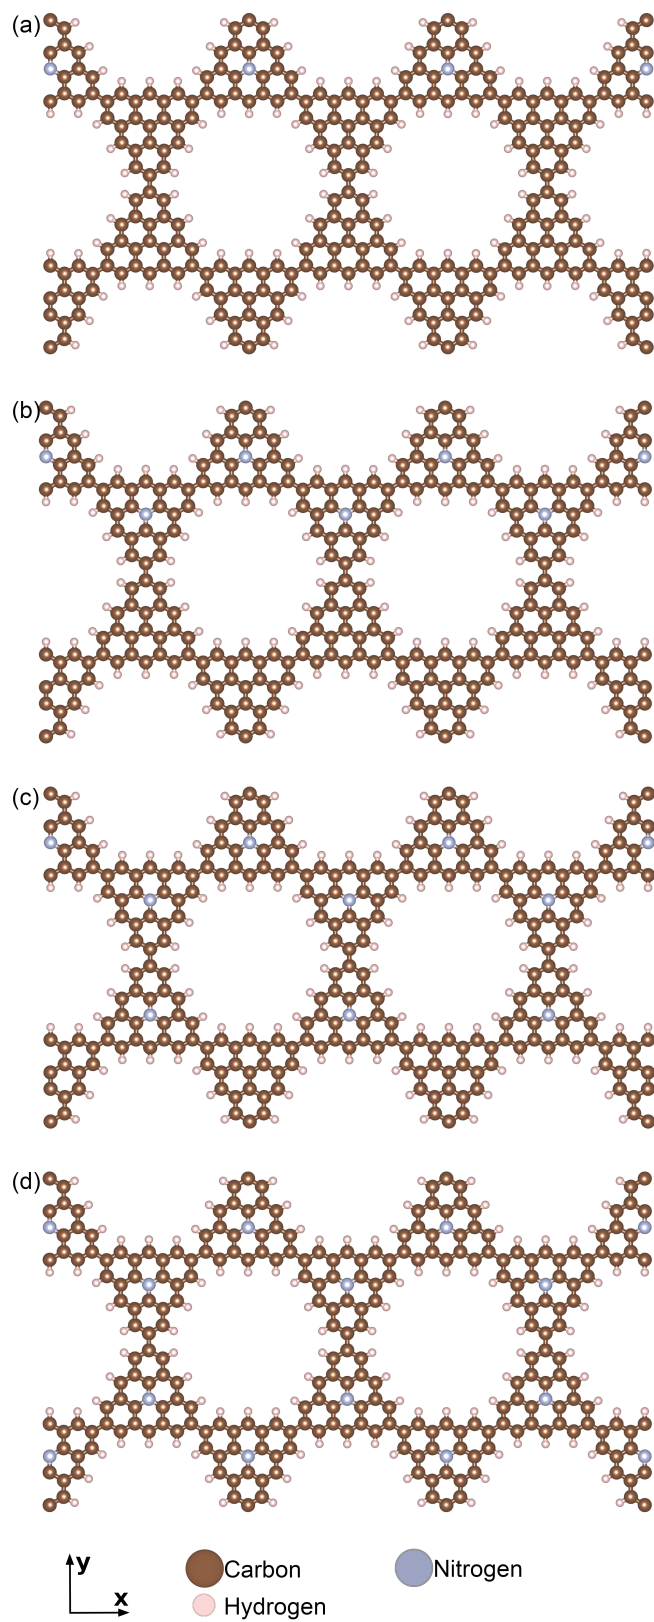

**Fig. S3** Optimized geometry of the scattering region of the transport device of N-doped 3-triangulene kagome: (a) 1N-doped, (b) 2N-doped, (c) 3N-doped and (d) 4N-doped.

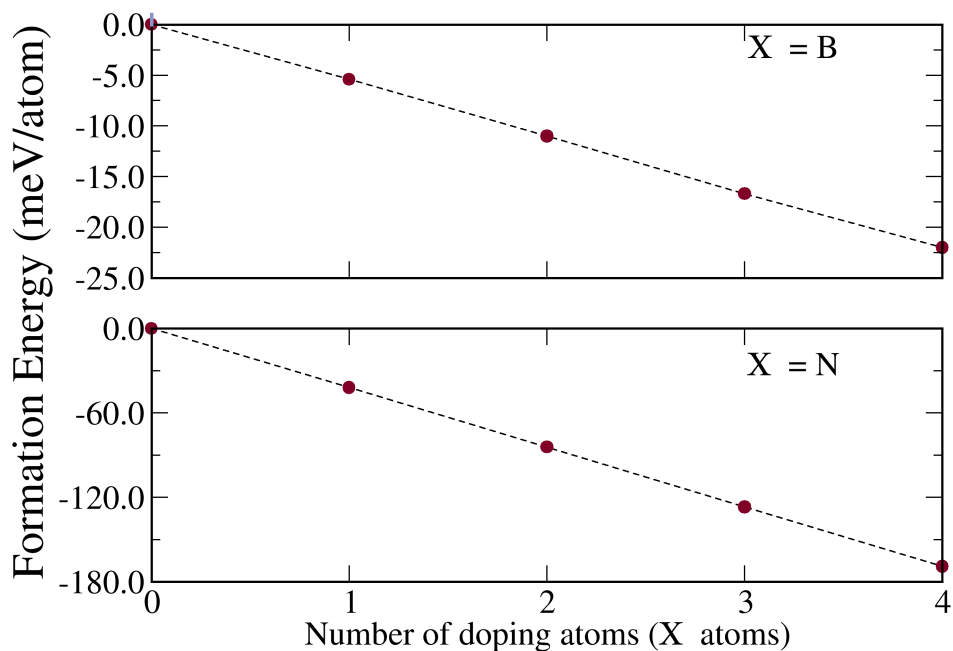

Fig. S4 Formation energy per atoms for the doped systems.

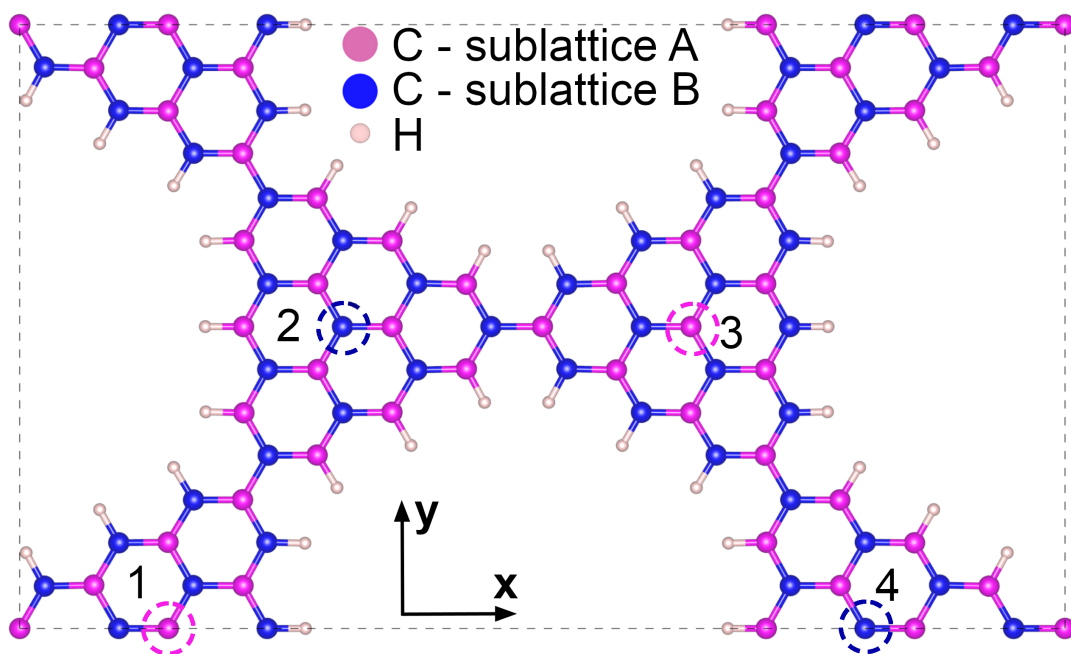

Fig. S5 Rectangular unit cell of 3-triangularene kagome crystal, where doping sites (sublattice A) are indicated by 1 and 3 (the magenta dashed circles), whereas sites (sublattice B) by 2 and 4 (blue dashed circles). In the figure, carbon atoms of sublattice A are magenta, while those of sublattice B are blue. Hydrogen atoms are light pink. So for the concentration of two dopants, the doping occurs in the same sublattice to the combinations of 1 and 3 sites or 2 and 4 sites. For the combinations of 1 and 3 sites, 1 and 4, 2 and 3, and finally 3 and 4, the doping occurs in different sublattices. The physical implications of these different doping schemes were discussed in the main text.

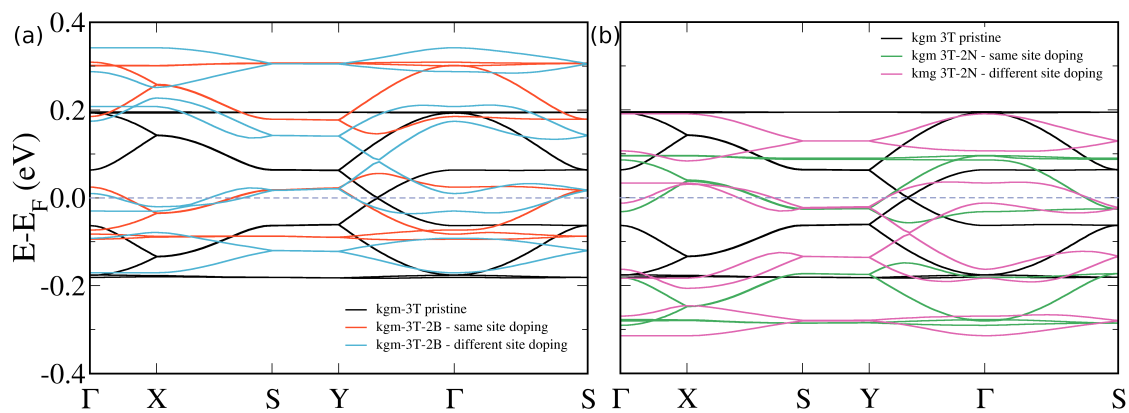

**Fig. S6** The pristine 3-triangular kagome band structure is represented by black solid lines. (a) 3-triangular kagome with 2 boron atoms doped in the same sublattice (orange solid lines) and with 2 boron atoms doped in the different sublattice (cyan solid lines) and (b) 3-triangular kagome with 2 boron atoms doped in the same sublattice site (green solid lines) and with 2 nitrogen atoms doped in the different sublattice site (magenta solid lines).

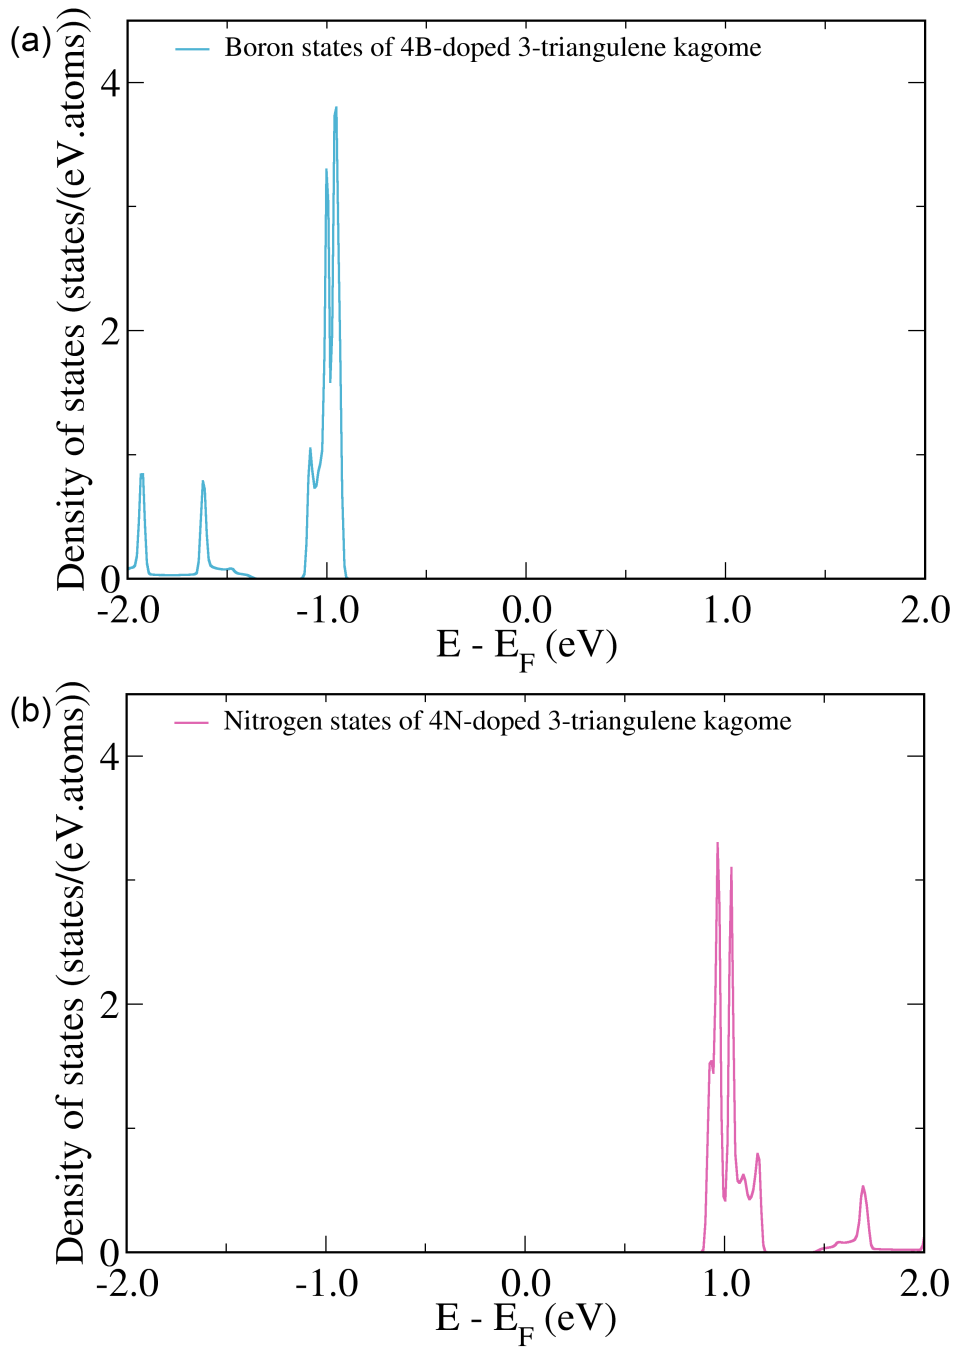

**Fig. S7** Projected Density of States for (a) boron atoms at 4B-doped 3-triangular kagome and (b) nitrogen atoms at 4N-doped 3-triangular kagome.
